# Supplementary material for: Air pollution emission inventory using national high-resolution spatial parameters for the Nordic countries
Source: Copernicus journal article supplement (doi:10.5194/essd-2023-366), 2023-11-15
Supplement: Supplementary file 1 [file essd-2023-366-supplement.pdf]

# Air pollution emission inventory using national high-resolution spatial parameters for the Nordic countries

## Supplement

Table S1 Main spatial proxies for all SNAP sectors used in the Nordic Countries.

| SNAP sector                                   | Denmark                                                                | Finland                                                                          | Iceland              | Norway                                                                        | Sweden                                                                     |
|-----------------------------------------------|------------------------------------------------------------------------|----------------------------------------------------------------------------------|----------------------|-------------------------------------------------------------------------------|----------------------------------------------------------------------------|
| 01 Energy                                     | Point sources                                                          | Point sources<br>Municipal energy<br>production fuel use                         |                      | Point sources                                                                 | Point sources                                                              |
| 02 Non-ind.<br>combustion                     | Chimney sweeper<br>data<br>Building and<br>dwelling register           | Building data<br>Residential area type<br>Heating degree day<br>Average wood use |                      | Building number<br>and type<br>Wood<br>consumption                            | Building number and<br>type<br>Wood consumption                            |
| 03 Manufacturing<br>industry                  | Point sources<br>Land use                                              | Point sources<br>Municipal energy<br>production fuel use                         | Point sources        | Point sources                                                                 | Point sources                                                              |
| 04 Production<br>processes                    | Point sources<br>Land use<br>Employment<br>statistics<br>Building data | Point sources<br>Municipal energy<br>production fuel use                         |                      | Point sources                                                                 | Point sources                                                              |
| 05 Extraction and<br>distribution of<br>fuels | Point sources<br>Building data<br>Service stations<br>Gas network data | Land use<br>Population                                                           |                      |                                                                               |                                                                            |
| 06 Solvent and<br>product use                 | Population<br>Building data<br>Land use<br>Road network                | Land use<br>Population                                                           |                      | Population                                                                    | Population                                                                 |
| 07 Road transport                             | Road and traffic<br>data                                               | Road and traffic data<br>Municipal fuel use<br>and vehicle-<br>kilometres        | Traffic<br>modelling | Road and traffic<br>data<br>Share of HDV<br>CO2 emission at<br>regional level | Road and traffic data<br>Share of HDV<br>CO2 emission at<br>regional level |

|    |                        |                                                                                                                                                     |                                      |          |          |
|----|------------------------|-----------------------------------------------------------------------------------------------------------------------------------------------------|--------------------------------------|----------|----------|
| 08 | Machinery and off-road | Aviation data<br>Land use<br>Fishing areas and catch statistics<br>Military training areas<br>Construction statistics<br>The Danish land use matrix | Land use<br>Road and traffic data    | Land use | Land use |
| 09 | Waste                  | Point sources<br>Building data<br>Population<br>Land use<br>Waste and recycling data                                                                | Population<br>Land use               |          |          |
| 10 | Agriculture            | General Agricultural Register<br>Central Husbandry Register<br>Fertilizer and livestock reporting<br>Land use<br>The Danish land use matrix         | Land use<br>Municipal animal numbers | Land use | Land use |
